# Supplementary material for: A Phase I, Multicenter, Open-Label, First-in-Human Study of DS-6157a in Patients with Advanced Gastrointestinal Stromal Tumor
Source: PubMed Central journal article supplement — Clin Cancer Res. 2023 Jun 26;29(18):3659–67. doi: 10.1158/1078-0432.CCR-23-0640 (PMC10502450; doi:10.1158/1078-0432.ccr-23-0640), 2023-06-26
Supplement: ccr-23-0640_supplementary_appendix_1_suppsa1.pdf [file ccr-23-0640_supplementary_appendix_1_suppsa1.pdf]

## **SUPPLEMENTARY APPENDIX**

Supplementary Appendix for: A Phase 1, Multicenter, Open-Label, First-in-Human Study of DS-6157a in Patients With Advanced Gastrointestinal Stromal Tumor

Suzanne George, Michael C. Heinrich, Neeta Somaiah, Peter Oppelt, Robert McLeod, Satoshi Nishioka, Madan G. Kundu, Xiaozhong Qian, Prasanna Kumar, Abderrahmane Laadem, Yvonne Lau, Brittany P. Tran, Maura Fallon, Ololade Dosunmu, Julia Shi, Yoichi Naito

## Supplementary Methods

### Dose-limiting toxicities (DLTs)

A DLT is defined as any of the following TEAEs that occur during the DLT evaluation period (21 days starting from Cycle 1 Day 1), excluding toxicities clearly related to disease progression or intercurrent illness, in patients participating in Dose Escalation (Part 1).

#### For hematologic toxicities, a DLT is defined as follows:

- Grade 4 neutrophil count decreased lasting >7 days
- Grade  $\geq 3$  febrile neutropenia
- Grade  $\geq 3$  anemia requiring transfusion
- Grade 4 anemia
- Grade 4 platelet count decreased, or
- Grade  $\geq 3$  platelet count decreased lasting >7 days
- Grade  $\geq 3$  platelet count decreased associated with clinically significant hemorrhage and/or requiring transfusion
- Grade 4 lymphocyte count decreased lasting  $\geq 14$  days

#### For hepatic organ toxicities, a DLT is defined as follows:

- Grade 4 aspartate aminotransferase (AST) or alanine aminotransferase (ALT) increased
- AST or ALT  $>3 \times$  upper limit of normal (ULN) if accompanied by grade  $\geq 2$  blood total bilirubin increased with serum alkaline phosphatase  $<2 \times$  ULN (based on Hy's law definition)
- In patients without liver metastases, AST or ALT  $>5 \times$  ULN
- In patients with liver metastases, AST or ALT  $>5 \times$  ULN, if the baseline level was  $\leq 3 \times$  ULN
- In patients with liver metastases, AST or ALT  $>8 \times$  ULN, if the baseline level was  $>3 \times$  ULN

#### For non-hematologic, non-hepatic major organ toxicities, a DLT is defined as follows:

- Symptomatic congestive heart failure
- Left ventricular ejection fraction (LVEF) decline to  $<40\%$  or
- Subject has absolute  $>20\%$  drop from their LVEF baseline
- Any LVEF decline from baseline leading to discontinuation of study treatment
- Grade  $\geq 2$  interstitial lung disease or pneumonitis
- Grade 3 skin toxicity lasting >7 days or grade 4 for any duration
- Grade  $\geq 3$  infusion-related reaction
