# Supplementary material for: A Phase I, Multicenter, Open-Label, First-in-Human Study of DS-6157a in Patients with Advanced Gastrointestinal Stromal Tumor
Source: PubMed Central journal article supplement — Clin Cancer Res. 2023 Jun 26;29(18):3659–67. doi: 10.1158/1078-0432.CCR-23-0640 (PMC10502450; doi:10.1158/1078-0432.ccr-23-0640), 2023-06-26
Supplement: ccr-23-0640_supplementary_figure_s1_suppsf1.pdf [file ccr-23-0640_supplementary_figure_s1_suppsf1.pdf]

**Supplementary Figure S1. Swimmer plot of tumor response over time**

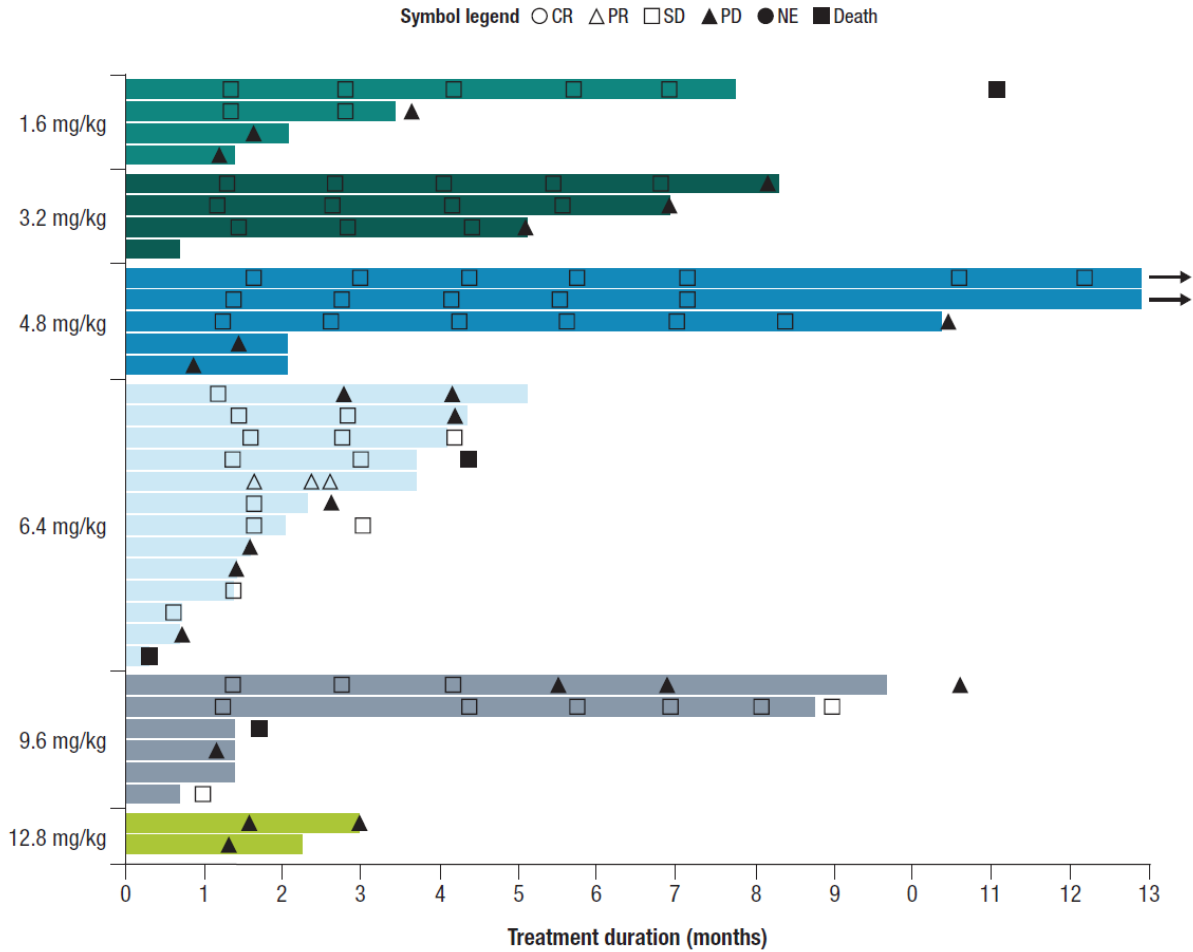

Best overall responses with confirmation of CR/PR are shown. Arrow: treatment continues; white circle: CR; white triangle, PR; white square, SD; black triangle, PD; black circle, NE; black square, death. Treatment duration (months) = (last dose date of study drug minus first dose date of study drug +21)/30.4375 (treatment duration adjusted for patients who died prior to study Day 21).

CR, complete response; NE, not evaluable; SD, stable disease
