# Supplementary material for: A Phase I, Multicenter, Open-Label, First-in-Human Study of DS-6157a in Patients with Advanced Gastrointestinal Stromal Tumor
Source: PubMed Central journal article supplement — Clin Cancer Res. 2023 Jun 26;29(18):3659–67. doi: 10.1158/1078-0432.CCR-23-0640 (PMC10502450; doi:10.1158/1078-0432.ccr-23-0640), 2023-06-26
Supplement: ccr-23-0640_supplementary_figure_s2_suppsf2.pdf [file ccr-23-0640_supplementary_figure_s2_suppsf2.pdf]

**Supplementary Figure S2. DXd immunohistochemistry in a patient treated with 6.4 mg/kg DS-6157a (A) pre-treatment and (B) on treatment (Cycle 2, Day 10)**

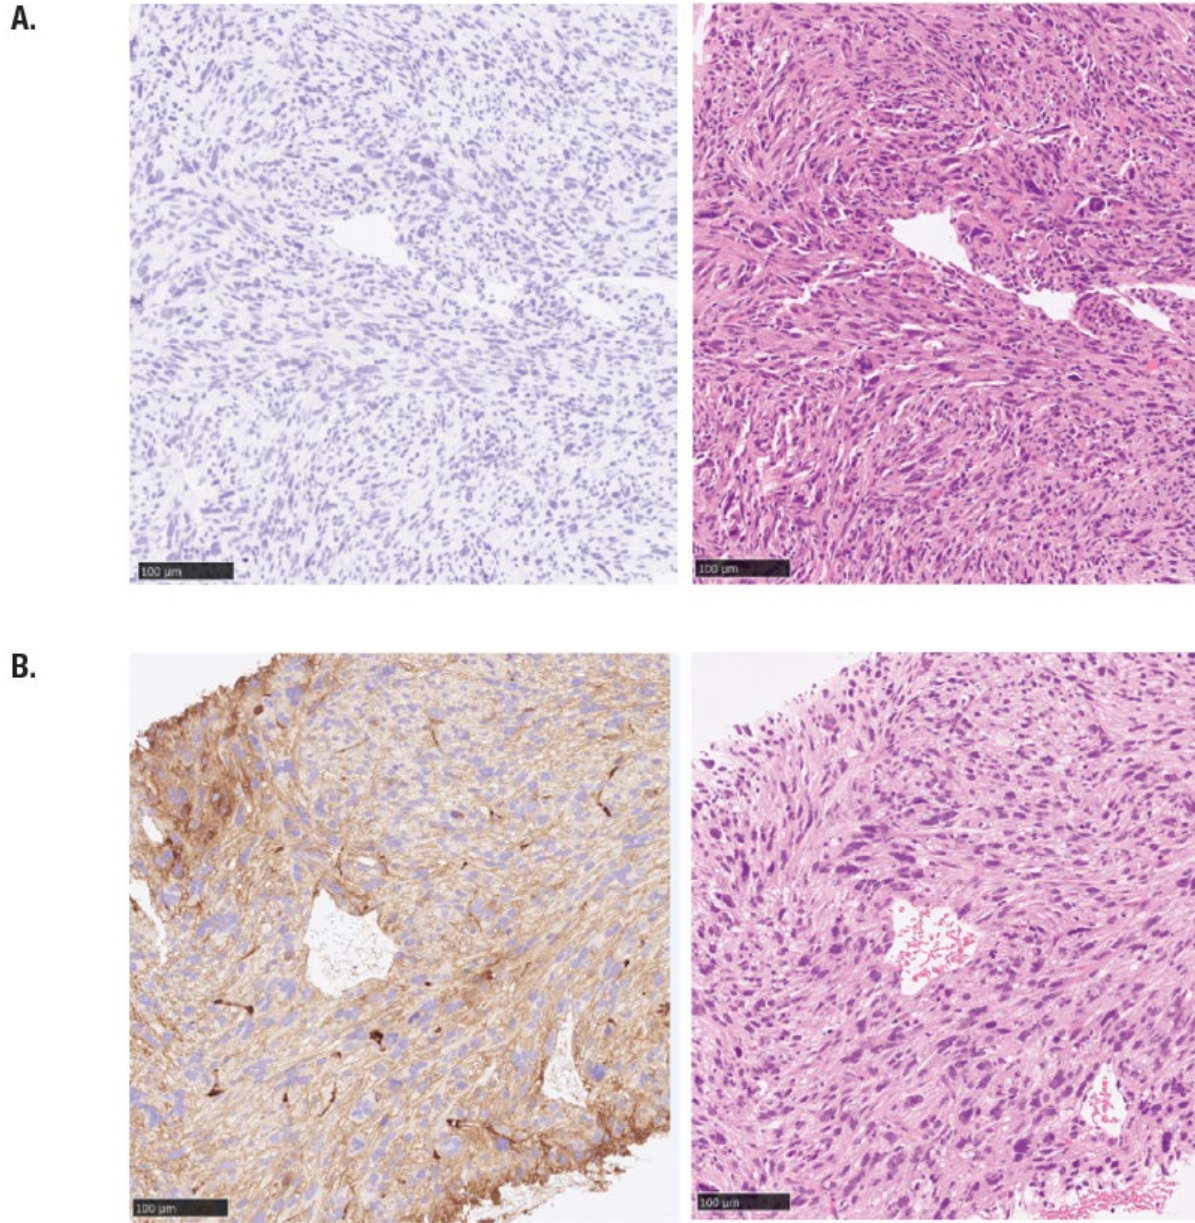

Images on the left are DXd-ADC IHC, images on the right are hematoxylin-eosin stained
