# Supplementary material for: A Phase I, Multicenter, Open-Label, First-in-Human Study of DS-6157a in Patients with Advanced Gastrointestinal Stromal Tumor
Source: PubMed Central journal article supplement — Clin Cancer Res. 2023 Jun 26;29(18):3659–67. doi: 10.1158/1078-0432.CCR-23-0640 (PMC10502450; doi:10.1158/1078-0432.ccr-23-0640), 2023-06-26
Supplement: ccr-23-0640_supplementary_tables_1-4_suppst1-4.pdf [file ccr-23-0640_supplementary_tables_1-4_suppst1-4.pdf]

**Supplementary Table S1. Representativeness of study participants**

|                                                      |                                                                                                                                                                                                                                            |
|------------------------------------------------------|--------------------------------------------------------------------------------------------------------------------------------------------------------------------------------------------------------------------------------------------|
| <b>Cancer type(s)/subtype(s)/stage(s)/condition:</b> | Gastrointestinal stromal tumors (GIST)                                                                                                                                                                                                     |
| <b>Considerations related to:</b>                    |                                                                                                                                                                                                                                            |
| Sex/gender                                           | The current study population included 19/34 (55.9%) male patients, which is in accordance with a recent population-based database study involving more than 10,000 patients (52% identified as male). <sup>1</sup>                         |
| Age                                                  | Most patients with GIST present $\geq 60$ years <sup>1</sup> , which generally aligns with the population in the current study, with a median age of 60.5 (range, 29-81).                                                                  |
| Race                                                 | Racial data on GIST patients report 68% as White, 19% as African Americans, and 13% classified as others. <sup>1</sup> In the current study, most patients were White or Asian (47.1% for each).                                           |
| Geography                                            | This study was conducted at 5 sites in the United States and Japan.                                                                                                                                                                        |
| <b>Overall representativeness of this study</b>      | Overall, the study population is generally consistent with the GIST population. Studies with larger sample size enrolling patients across multiple countries would improve applicability and better represent the GIST patient population. |

1. Khan J et al. Gastrointestinal Stromal Tumors (GIST): A Population-Based Study Using the SEER Database, including Management and Recent Advances in Targeted Therapy. *Cancers* 2022, 14, 3689.

**Supplementary Table S2. Patient disposition**

| <b>n (%)</b>                                              | <b>DS-6157a<br/>1.6 mg/kg<br/>(n=4)</b> | <b>DS-6157a<br/>3.2 mg/kg<br/>(n=4)</b> | <b>DS-6157a<br/>4.8 mg/kg<br/>(n=5)</b> | <b>DS-6157a<br/>6.4 mg/kg<br/>(n=13)</b> | <b>DS-6157a<br/>9.6 mg/kg<br/>(n=6)</b> | <b>DS-6157a<br/>12.8 mg/kg<br/>(n=2)</b> | <b>Total<br/>(n=34)</b> |
|-----------------------------------------------------------|-----------------------------------------|-----------------------------------------|-----------------------------------------|------------------------------------------|-----------------------------------------|------------------------------------------|-------------------------|
| <b>Treatment status</b>                                   |                                         |                                         |                                         |                                          |                                         |                                          |                         |
| Remaining on study treatment                              | 0                                       | 0                                       | 0                                       | 0                                        | 0                                       | 0                                        | 0                       |
| Discontinued study treatment                              | 4 (100.0)                               | 4 (100.0)                               | 5 (100.0)                               | 13 (100.0)                               | 6 (100.0)                               | 2 (100.0)                                | 34 (100.0)              |
| <b>Primary reason for study treatment discontinuation</b> |                                         |                                         |                                         |                                          |                                         |                                          |                         |
| Progressive disease                                       | 3 (75.0)                                | 3 (75.0)                                | 4 (80.0)                                | 5 (38.5)                                 | 1 (16.7)                                | 2 (100)                                  | 18 (52.9)               |
| Physician decision                                        | 0                                       | 0                                       | 1 (20.0)                                | 3 (23.1)                                 | 2 (33.3)                                | 0                                        | 6 (17.6)                |
| Adverse event                                             | 0                                       | 0                                       | 0                                       | 3 (23.1)                                 | 0                                       | 0                                        | 3 (8.8)                 |
| Clinical progression                                      | 1 (25.0)                                | 1 (25.0)                                | 0                                       | 0                                        | 1 (16.7)                                | 0                                        | 3 (8.8)                 |
| Withdrawal by patient                                     | 0                                       | 0                                       | 0                                       | 1 (7.7)                                  | 2 (33.3)                                | 0                                        | 3 (8.8)                 |
| Other                                                     | 0                                       | 0                                       | 0                                       | 1 (7.7)                                  | 0                                       | 0                                        | 1 (2.9)                 |

**Supplementary Table S3. Treatment-emergent adverse events reported in  $\geq 10\%$  of patients**

| <b>n (%)</b>                     | <b>DS-6157a 1.6<br/>mg/kg<br/>(n=4)</b> | <b>DS-6157a 3.2<br/>mg/kg<br/>(n=4)</b> | <b>DS-6157a 4.8<br/>mg/kg<br/>(n=5)</b> | <b>DS-6157a 6.4<br/>mg/kg<br/>(n=13)</b> | <b>DS-6157a 9.6<br/>mg/kg<br/>(n=6)</b> | <b>DS-6157a<br/>12.8 mg/kg<br/>(n=2)</b> | <b>Total<br/>(n=34)</b> |
|----------------------------------|-----------------------------------------|-----------------------------------------|-----------------------------------------|------------------------------------------|-----------------------------------------|------------------------------------------|-------------------------|
| Patients with any TEAE           | 4 (100.0)                               | 4 (100.0)                               | 5 (100.0)                               | 13 (100.0)                               | 6 (100.0)                               | 2 (100.0)                                | 34 (100.0)              |
| Nausea                           | 3 (75.0)                                | 3 (75.0)                                | 3 (60.0)                                | 11 (84.6)                                | 6 (100.0)                               | 2 (100.0)                                | 28 (82.4)               |
| Decreased appetite               | 3 (75.0)                                | 2 (50.0)                                | 4 (80.0)                                | 6 (46.2)                                 | 4 (66.7)                                | 2 (100.0)                                | 21 (61.8)               |
| Anemia                           | 3 (75.0)                                | 2 (50.0)                                | 4 (80.0)                                | 6 (46.2)                                 | 3 (50.0)                                | 1 (50.0)                                 | 19 (55.9)               |
| Fatigue                          | 3 (75.0)                                | 1 (25.0)                                | 3 (60.0)                                | 6 (46.2)                                 | 2 (33.3)                                | 2 (100.0)                                | 17 (50.0)               |
| Constipation                     | 1 (25.0)                                | 2 (50.0)                                | 2 (40.0)                                | 5 (38.5)                                 | 2 (33.3)                                | 2 (100.0)                                | 14 (41.2)               |
| Platelet count decreased         | 0                                       | 1 (25.0)                                | 2 (40.0)                                | 4 (30.8)                                 | 5 (83.3)                                | 1 (50.0)                                 | 13 (38.2)               |
| Vomiting                         | 1 (25.0)                                | 2 (50.0)                                | 2 (40.0)                                | 4 (30.8)                                 | 1 (16.7)                                | 2 (100.0)                                | 12 (35.3)               |
| Abdominal pain                   | 1 (25.0)                                | 2 (50.0)                                | 1 (20.0)                                | 2 (15.4)                                 | 1 (16.7)                                | 2 (100.0)                                | 9 (26.5)                |
| ALT increased                    | 2 (50.0)                                | 1 (25.0)                                | 2 (40.0)                                | 3 (23.1)                                 | 1 (16.7)                                | 0                                        | 9 (26.5)                |
| AST increased                    | 1 (25.0)                                | 1 (25.0)                                | 2 (40.0)                                | 3 (23.1)                                 | 1 (16.7)                                | 1 (50.0)                                 | 9 (26.5)                |
| Neutrophil count decreased       | 0                                       | 0                                       | 0                                       | 5 (38.5)                                 | 4 (66.7)                                | 0                                        | 9 (26.5)                |
| White blood cell count decreased | 0                                       | 0                                       | 0                                       | 3 (23.1)                                 | 5 (83.3)                                | 1 (50.0)                                 | 9 (26.5)                |
| Peripheral edema                 | 1 (25.0)                                | 1 (25.0)                                | 3 (60.0)                                | 1 (7.7)                                  | 0                                       | 2 (100.0)                                | 8 (23.5)                |
| Dizziness                        | 1 (25.0)                                | 0                                       | 0                                       | 4 (30.8)                                 | 1 (16.7)                                | 2 (100.0)                                | 8 (23.5)                |
| Insomnia                         | 1 (25.0)                                | 2 (50.0)                                | 1 (20.0)                                | 2 (15.4)                                 | 2 (33.3)                                | 0                                        | 8 (23.5)                |
| Pyrexia                          | 1 (25.0)                                | 0                                       | 2 (40.0)                                | 4 (30.8)                                 | 0                                       | 0                                        | 7 (20.6)                |
| Headache                         | 1 (25.0)                                | 1 (25.0)                                | 1 (20.0)                                | 4 (30.8)                                 | 0                                       | 0                                        | 7 (20.6)                |
| Dry skin                         | 1 (25.0)                                | 2 (50.0)                                | 3 (60.0)                                | 0                                        | 0                                       | 1 (50.0)                                 | 7 (20.6)                |
| Diarrhea                         | 0                                       | 0                                       | 1 (20.0)                                | 3 (23.1)                                 | 1 (16.7)                                | 1 (50.0)                                 | 6 (17.6)                |

|                                    |          |          |          |          |          |           |          |
|------------------------------------|----------|----------|----------|----------|----------|-----------|----------|
| Hypokalemia                        | 0        | 1 (25.0) | 1 (20.0) | 2 (15.4) | 1 (16.7) | 1 (50.0)  | 6 (17.6) |
| Dehydration                        | 1 (25.0) | 0        | 0        | 1 (7.7)  | 1 (16.7) | 2 (100.0) | 5 (14.7) |
| Hyperuricemia                      | 0        | 1 (25.0) | 1 (20.0) | 1 (7.7)  | 2 (33.3) | 0         | 5 (14.7) |
| Hypoalbuminemia                    | 0        | 1 (25.0) | 2 (40.0) | 2 (15.4) | 0        | 0         | 5 (14.7) |
| Dyspnea                            | 0        | 0        | 0        | 3 (23.1) | 2 (33.3) | 0         | 5 (14.7) |
| Maculopapular rash                 | 1 (25.0) | 1 (25.0) | 1 (20.0) | 0        | 2 (33.3) | 0         | 5 (14.7) |
| Hypertension                       | 1 (25.0) | 1 (25.0) | 0        | 2 (15.4) | 0        | 1 (50.0)  | 5 (14.7) |
| Abdominal distension               | 0        | 1 (25.0) | 1 (20.0) | 1 (7.7)  | 0        | 1 (50.0)  | 4 (11.8) |
| Infusion-related reaction          | 0        | 0        | 0        | 3 (23.1) | 1 (16.7) | 0         | 4 (11.8) |
| Blood alkaline phosphate increased | 0        | 0        | 0        | 2 (15.4) | 1 (16.7) | 1 (50.0)  | 4 (11.8) |
| Lymphocyte count decreased         | 0        | 0        | 1 (20.0) | 1 (7.7)  | 1 (16.7) | 1 (50.0)  | 4 (11.8) |
| Weight decreased                   | 0        | 0        | 1 (20.0) | 2 (15.4) | 0        | 1 (50.0)  | 4 (11.8) |
| Dysgeusia                          | 0        | 1 (25.0) | 1 (20.0) | 2 (15.4) | 0        | 0         | 4 (11.8) |
| Cough                              | 1 (25.0) | 0        | 0        | 3 (23.1) | 0        | 0         | 4 (11.8) |
| Hyperhidrosis                      | 1 (25.0) | 0        | 1 (20.0) | 1 (7.7)  | 1 (16.7) | 0         | 4 (11.8) |

ALT, alanine aminotransferase; AST, aspartate aminotransferase; TEAE, treatment emergent adverse event

**Supplementary Table S4. Best overall response**

| <b>n (%)</b>        | <b>DS-6157a 1.6<br/>mg/kg<br/>(n=4)</b> | <b>DS-6157a 3.2<br/>mg/kg<br/>(n=4)</b> | <b>DS-6157a 4.8<br/>mg/kg<br/>(n=5)</b> | <b>DS-6157a 6.4<br/>mg/kg<br/>(n=13)</b> | <b>DS-6157a 9.6<br/>mg/kg<br/>(n=6)</b> | <b>DS-6157a<br/>12.8 mg/kg<br/>(n=2)</b> | <b>Total<br/>(n=34)</b> |
|---------------------|-----------------------------------------|-----------------------------------------|-----------------------------------------|------------------------------------------|-----------------------------------------|------------------------------------------|-------------------------|
| Complete response   | 0                                       | 0                                       | 0                                       | 0                                        | 0                                       | 0                                        | 0                       |
| Partial response    | 0                                       | 0                                       | 0                                       | 1 (7.7)                                  | 0                                       | 0                                        | 1 (2.9)                 |
| Stable disease      | 2 (50.0)                                | 3 (75.0)                                | 3 (60.0)                                | 7 (53.8)                                 | 2 (33.3)                                | 0                                        | 17 (50.0)               |
| Progressive disease | 2 (50.0)                                | 0                                       | 2 (40.0)                                | 3 (23.1)                                 | 1 (16.7)                                | 2 (100.0)                                | 10 (29.4)               |
| Not evaluable       | 0                                       | 1 (25.0)                                | 0                                       | 2 (15.4)                                 | 3 (50.0)                                | 0                                        | 6 (17.6)                |
